# Supplementary material for: Genome-Wide Association Study Reveals the Genetic Architecture for Calcium Accumulation in Grains of Hexaploid Wheat (Triticum Aestivum L.)
Source: Research Square preprint supplement (doi:10.21203/rs.3.rs-1104188/v1), 2021-11-30
Supplement: Supplementary file 1 [file 69b52a1f759205bfaa0afbc1.xlsx]

## Sheet: Sheet2
Table 3. List of significant loci and their detailed Ca concentration information as identified by the GWAS
SNP_id1	Chromosome	Position (Mb)2	Region	Near locus previous reported in the same chromosome3	Candidate genes	Annotation
			(Mb)
AX-110634514	2A	49.22	49.06-59.07	Kukri_c40035_258	TraesCS2A02G098100	Calmodulin
AX-109541359	3A	662.4	662.40-731.09	S3A_593702925	TraesCS3A02G424700	Cytochrome P450
				CFA2262-wPt_3816
AX-110013515	3B	13.97	2.15-20.50	gwm389-wPt-8093(C)	TraesCS3B02G018800	Transmembrane protein
AX-110922471	3B	376.63	294.5-404.8	QGCaUE-3B	TraesCS3B02G241000	V-type proton ATPase subunit d
AX-94729264	3D	40.53	40.53	S3D_45073985	TraesCS3D02G079600	Ubiquitin family protein
AX-108912427	4A	699.57	676.78-699.57	gwm165a-wmc420	TraesCS4A02G428900	V-type proton ATPase subunit e
1 The ID of the loci linked to the significant SNP identified in the GWAS.
2 The significant SNPs’ physical positions in the ‘Chinese Spring’ reference genome (IWGSC RefSeq v2.0).
3 Co-localized QTLs at this locus compared with in the literature.
